# Supplementary material for: Neuromuscular control of locomotion is altered by tail autotomy in geckos
Source: Oxford University Press journal article supplement (doi:10.1242/jeb.179564), 2018-01-01
Supplement: jeb179564supp.pdf [file jeb179564supp.pdf]

**Table S1.** Trials completed for each individual used in this study

| Individual | Treatment     | Trial | Speed (cm/s) | Speed (SVL/s) |
|------------|---------------|-------|--------------|---------------|
| 1          | Pre-Autotomy  | 1     | 3.660        | 0.332         |
|            |               | 2     | 3.311        | 0.301         |
|            |               | 3     | 3.171        | 0.288         |
|            |               | 4     | 3.428        | 0.311         |
|            |               | 5     | 2.388        | 0.217         |
|            |               | 6     | 2.929        | 0.266         |
|            | Post-Autotomy | 1     | 3.928        | 0.357         |
|            |               | 2     | 3.960        | 0.360         |
|            |               | 3     | 3.525        | 0.320         |
|            |               | 4     | 3.928        | 0.357         |
|            |               | 5     | 3.960        | 0.360         |
|            |               | 6     | 3.525        | 0.320         |
| 2          | Pre-Autotomy  | 1     | 3.743        | 0.352         |
|            |               | 2     | 2.950        | 0.277         |
|            |               | 3     | 2.828        | 0.266         |
|            |               | 4     | 2.628        | 0.247         |
|            |               | 5     | 2.798        | 0.263         |
|            | Post-Autotomy | 1     | 4.109        | 0.386         |
|            |               | 2     | 3.742        | 0.352         |
|            |               | 3     | 3.205        | 0.301         |
|            |               | 4     | 3.504        | 0.330         |
|            |               | 5     | 3.092        | 0.291         |
| 3          | Pre-Autotomy  | 1     | 6.172        | 0.580         |
|            |               | 2     | 6.207        | 0.583         |
|            |               | 3     | 5.586        | 0.525         |
|            |               | 4     | 5.150        | 0.484         |
|            |               | 5     | 4.298        | 0.404         |
|            | Post-Autotomy | 1     | 5.486        | 0.515         |
|            |               | 2     | 5.419        | 0.509         |
|            |               | 3     | 5.255        | 0.494         |
|            |               | 4     | 5.503        | 0.517         |
|            |               | 5     | 4.773        | 0.448         |

**Table S1.** Trials completed for each individual used in this study (continued)

| Individual    | Treatment     | Trial        | Speed (cm/s) | Speed (SVL/s) |
|---------------|---------------|--------------|--------------|---------------|
| 4             | Pre-Autotomy  | 1            | 2.612        | 0.225         |
|               |               | 2            | 2.804        | 0.242         |
|               |               | 3            | 2.231        | 0.192         |
|               |               | 4            | 3.027        | 0.261         |
|               |               | 5            | 3.064        | 0.264         |
|               |               | 6            | 2.532        | 0.218         |
|               | Post-Autotomy | 1            | 3.134        | 0.270         |
|               |               | 2            | 3.655        | 0.315         |
|               |               | 3            | 3.933        | 0.339         |
|               |               | 4            | 4.670        | 0.402         |
|               |               | 5            | 4.360        | 0.376         |
|               |               | 6            | 4.058        | 0.350         |
|               |               | 7            | 2.282        | 0.197         |
|               | 5             | Pre-Autotomy | 1            | 8.698         |
| 2             |               |              | 8.256        | 0.776         |
| 3             |               |              | 7.561        | 0.711         |
| 4             |               |              | 7.712        | 0.725         |
| 5             |               |              | 7.335        | 0.690         |
| Post-Autotomy |               | 1            | 5.107        | 0.480         |
|               |               | 2            | 4.579        | 0.431         |
|               |               | 3            | 5.082        | 0.478         |
|               |               | 4            | 5.110        | 0.480         |
|               |               | 5            | 5.029        | 0.473         |
|               |               | 6            | 4.177        | 0.393         |
| 6             |               | Pre-Autotomy | 1            | 3.000         |
|               | 2             |              | 3.063        | 0.267         |
|               | 3             |              | 3.148        | 0.274         |
|               | 4             |              | 3.152        | 0.275         |
|               | 5             |              | 2.910        | 0.253         |
|               | Post-Autotomy | 1            | 3.436        | 0.299         |
|               |               | 2            | 3.633        | 0.316         |
|               |               | 3            | 3.725        | 0.324         |
|               |               | 4            | 3.499        | 0.305         |
|               |               | 5            | 3.700        | 0.322         |

**Table S1.** Trials completed for each individual used in this study (continued)

| Individual | Treatment     | Trial | Speed (cm/s) | Speed (SVL/s) |
|------------|---------------|-------|--------------|---------------|
| 7          | Pre-Autotomy  | 1     | 7.242        | 0.596         |
|            |               | 2     | 7.184        | 0.591         |
|            |               | 3     | 6.113        | 0.503         |
|            |               | 4     | 5.248        | 0.432         |
|            |               | 5     | 6.174        | 0.508         |
|            | Post-Autotomy | 1     | 8.182        | 0.673         |
|            |               | 2     | 8.008        | 0.659         |
|            |               | 3     | 10.285       | 0.846         |
|            |               | 4     | 8.748        | 0.720         |
|            |               | 5     | 4.971        | 0.409         |
| 8          | Pre-Autotomy  | 1     | 6.821        | 0.640         |
|            |               | 2     | 5.249        | 0.493         |
|            |               | 3     | 5.363        | 0.503         |
|            |               | 4     | 4.211        | 0.395         |
|            |               | 5     | 4.645        | 0.436         |
|            |               | 6     | 3.693        | 0.347         |
|            | Post-Autotomy | 1     | 3.219        | 0.302         |
|            |               | 2     | 2.922        | 0.274         |
|            |               | 3     | 2.932        | 0.275         |
|            |               | 4     | 2.611        | 0.245         |
| 9          | Pre-Autotomy  | 5     | 2.255        | 0.212         |
|            |               | 1     | 4.157        | 0.386         |
|            |               | 2     | 4.011        | 0.372         |
|            |               | 3     | 3.389        | 0.314         |
|            |               | 4     | 2.781        | 0.258         |
|            |               | 5     | 3.007        | 0.279         |
|            |               | 6     | 3.415        | 0.317         |
|            | Post-Autotomy | 7     | 3.468        | 0.322         |
|            |               | 1     | 3.003        | 0.279         |
|            |               | 2     | 2.955        | 0.274         |
|            |               | 3     | 2.230        | 0.207         |
|            |               | 4     | 1.633        | 0.152         |
|            |               | 5     | 2.197        | 0.204         |
|            |               | 6     | 2.899        | 0.269         |
| 7          | 3.250         | 0.302 |              |               |
| 8          | 3.040         | 0.282 |              |               |

**Table S1.** Trials completed for each individual used in this study (continued)

| Individual | Treatment     | Trial | Speed (cm/s) | Speed (SVL/s) |
|------------|---------------|-------|--------------|---------------|
| 10         | Pre-Autotomy  | 1     | 6.714        | 0.613         |
|            |               | 2     | 6.623        | 0.604         |
|            |               | 3     | 5.936        | 0.541         |
|            |               | 4     | 5.407        | 0.493         |
|            |               | 5     | 5.861        | 0.535         |
|            |               | 6     | 5.437        | 0.496         |
|            | Post-Autotomy | 1     | 4.086        | 0.373         |
|            |               | 2     | 4.016        | 0.366         |
|            |               | 3     | 4.055        | 0.370         |
|            |               | 4     | 4.002        | 0.365         |
|            |               | 5     | 4.176        | 0.381         |
|            |               | 6     | 4.086        | 0.373         |
|            |               | 7     | 4.585        | 0.418         |
